# Supplementary material for: Endothelin receptor type A expression defines a distinct cardiac subdomain within the heart field and is later implicated in chamber myocardium formation
Source: Oxford University Press journal article supplement (doi:10.1242/dev.054015), 2010-10-08
Supplement: dev054015supptables1.pdf [file dev054015supptables1.pdf]

**Table S1. Primers and reaction conditions for RT-PCR analysis**

| Gene                       | Accession number | Forward (5'-3')        | Reverse (5'-3')            | Amplicon length (bp) | Annealing temperature (°C) |
|----------------------------|------------------|------------------------|----------------------------|----------------------|----------------------------|
| <b>Conventional RT-PCR</b> |                  |                        |                            |                      |                            |
| <i>Cx40</i>                | NM_008121        | TGGGCAGTTGAACAGCAGCCAG | CCCAGGAAGCTCCAGTCACCCA     | 119                  | 60                         |
| <i>Ednra</i>               | NM_010332.2      | ACGCTGGCCTTTTCG        | CTGAGCAGTTCACACCGGTTCTTATC | 603                  | 61                         |
| <i>EGFP</i>                | U57609.1         | GACGTAAACGGCCACAAGTTCA | GAAGTCCAGCAGGACCATGTGATC   | 608                  | 61                         |
| <i>Gapdh</i>               | XR_030830.1      | GGTGTGAACCACGAGAAATAT  | AGATCCACGACGGACACATT       | 334                  | 61                         |
| <i>Hand1</i>               | NM_008213.2      | GGAGTTGCCTCAGCAGCCCG   | CCGTAGCCGCTGCGTCCTTT       | 200                  | 60                         |
| <i>Isl1</i>                | NM_021459.3      | GCCTGCAGCCGACAGCTCAT   | AGGTCCGCAAGGTGTGCAGC       | 271                  | 60                         |
| <i>Nkx2.5</i>              | NM_008700.2      | CCCAGCCGCCCCACATTTT    | GCGCCATCCGTCTCGGCTTT       | 132                  | 60                         |
| <i>Tbx2</i>                | NM_009324.2      | CGAGATGCCTAAACGCATG    | CAAGATGTCATTGGCTCGCAC      | 190                  | 60                         |
| <i>Tbx5</i>                | NM_011537.2      | ACACATGGCCCAGCATGCCC   | CCCGCACTGCCTGACCACAG       | 138                  | 60                         |
| <i>Tbx18</i>               | NM_023814.3      | GGTATGTTTACCATAGCTCT   | AAGGTGAGAGTCCGTAGTGAT      | 472                  | 60                         |
| <b>Real time PCR</b>       |                  |                        |                            |                      |                            |
| <i>Hand1</i>               | NM_008213.2      | GGAGTTGCCTCAGCAGCCCG   | CCGTAGCCGCTGCGTCCTTT       | 200                  | 61                         |
| <i>HPRT</i>                | NM_013556.2      | AGCGCAAGTTGAATCTGC     | AGCGACAATCTACCAGAG         | 119                  | 60                         |
| <i>Nkx2.5</i>              | NM_008700.2      | CCCAGCCGCCCCACATTTT    | GCGCCATCCGTCTCGGCTTT       | 132                  | 61                         |
| <i>Tbx5</i>                | NM_011537.2      | ACACATGGCCCAGCATGCCC   | CCCGCACTGCCTGACCACAG       | 138                  | 61                         |
