# Supplementary figures and images for: Endothelin receptor type A expression defines a distinct cardiac subdomain within the heart field and is later implicated in chamber myocardium formation
Source: Oxford University Press journal article supplement (doi:10.1242/dev.054015), 2010-10-08

*Ednra*<sup>+</sup>

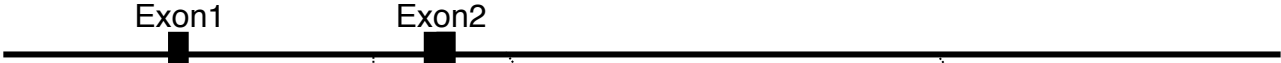

Targeting construct

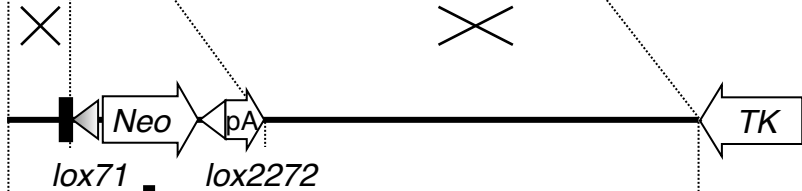

*Ednra*<sup>neo</sup>

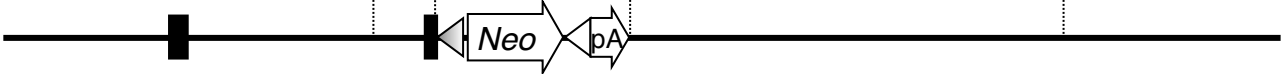

+ Cre recombinase

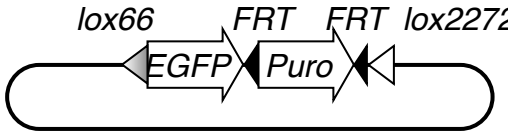

*Ednra*<sup>EGFP</sup>

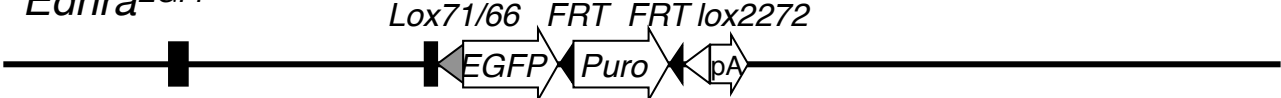

Supplement: dev054015figs1.pdf [file dev054015figs1.pdf]

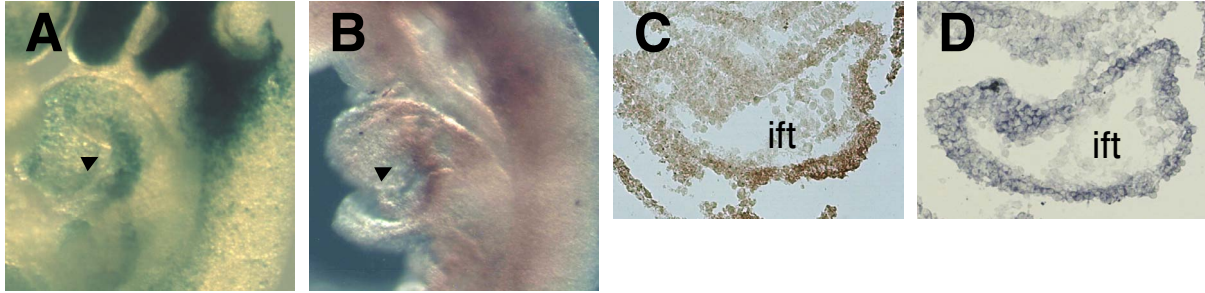

**E**

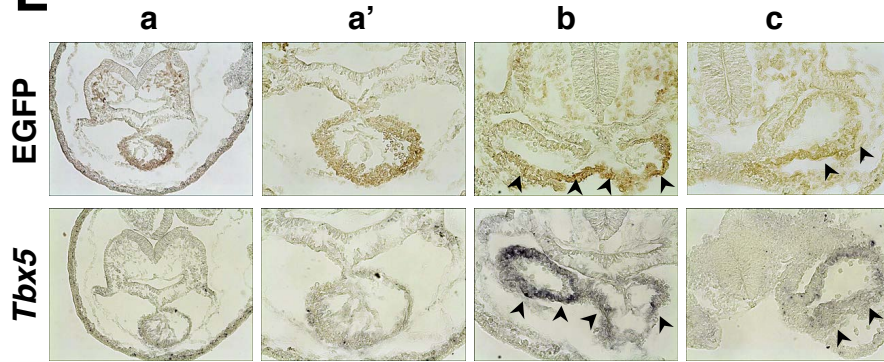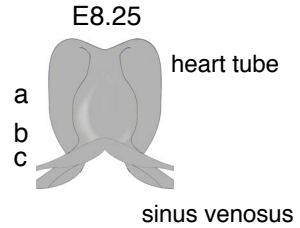

Supplement: dev054015figs2.pdf [file dev054015figs2.pdf]

Heart tube

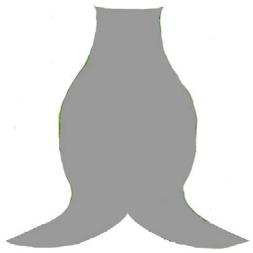

Ventricle

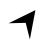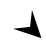

Inflow

0h

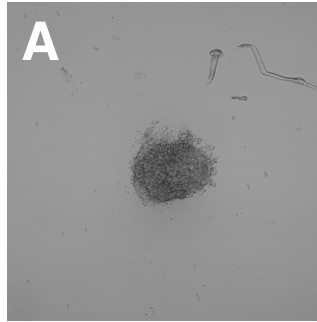

24h

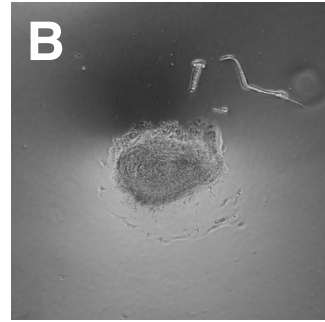

**C**

**EGFP**

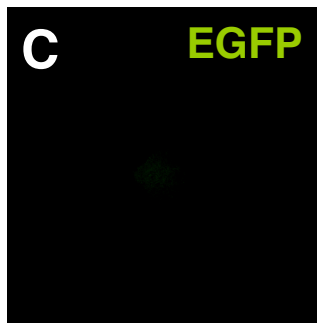

**D**

**EGFP**

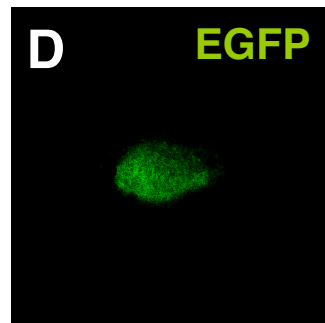

0h

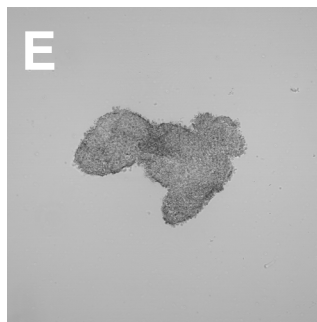

24h

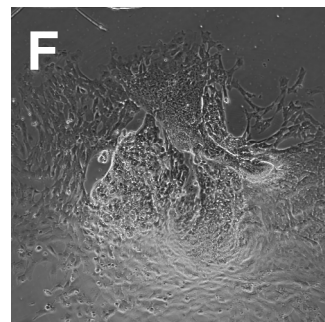

**G**

**EGFP**

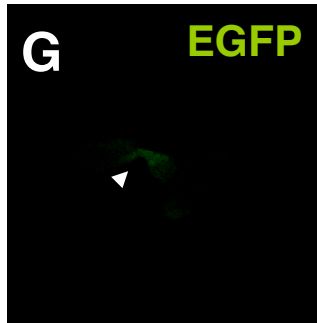

**H**

**EGFP**

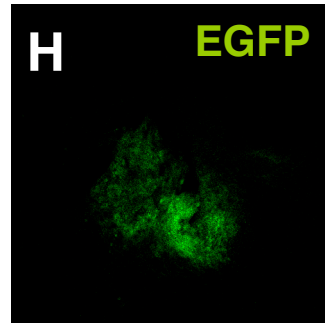

Supplement: dev054015figs3.pdf [file dev054015figs3.pdf]

**A**      *Ednra* *lacZ/+*

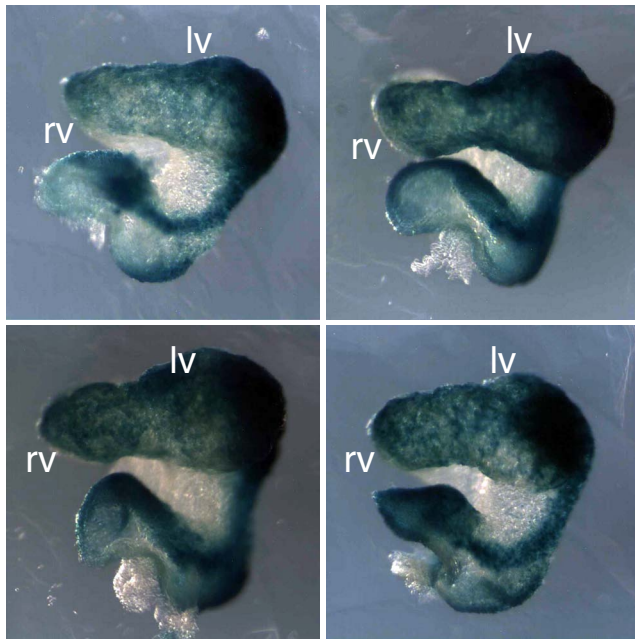

**B**      *Ednra* *lacZ/EGFP*

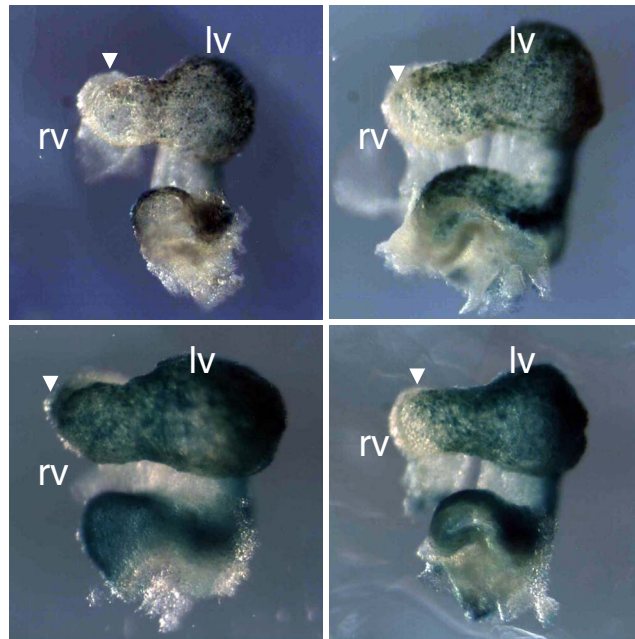

Supplement: dev054015figs4.pdf [file dev054015figs4.pdf]
